# Supplementary material for: Glycidyl Azide Polymer and its Derivatives-Versatile Binders for Explosives and Pyrotechnics: Tutorial Review of Recent Progress
Source: MDPI journal article supplement (doi:10.3390/molecules24244475), 2019-12-06
Supplement: s1 [file s1]

| Main component(s)           | Curing agent(s)                        | Young's modulus<br>[MPa]                          | Tensile strength<br>[MPa]                            | Elongation<br>at break [%]                          | Reagent ratios / notes                                                                                            | Comments / methodological notes                                                                                                                                                                                                                                                                                                              | Ref. |
|-----------------------------|----------------------------------------|---------------------------------------------------|------------------------------------------------------|-----------------------------------------------------|-------------------------------------------------------------------------------------------------------------------|----------------------------------------------------------------------------------------------------------------------------------------------------------------------------------------------------------------------------------------------------------------------------------------------------------------------------------------------|------|
| GAP                         | CA1                                    | 5.36<br>0.65                                      | 2.53<br>0.33                                         | 47.6<br>81.6                                        | N3/alkyne 2:1<br>N3/alkyne 3:1                                                                                    | 10mm wide strips, tensile rate 50mm/min, CMT6503 universal testing machine (SANS, Shenzhen, China)                                                                                                                                                                                                                                           | 17   |
| GAP                         | CA2                                    | 174.1<br>9.1                                      | 13.1<br>4.5                                          | ~28<br>81.7                                         | CA2/GAP 5:1<br>CA2/GAP 3:1                                                                                        | 10mm wide strips, tensile rate 50mm/min, CMT6503 universal testing machine (SANS, Shenzhen, China)                                                                                                                                                                                                                                           | 18   |
| GAP                         | CA3                                    | 0.07<br>0.16<br>0.25<br>-<br>0.53<br>0.72<br>4.17 | 0.08<br>0.11<br>0.12<br>0.18<br>0.19<br>0.20<br>1.04 | 147<br>73.2<br>48.3<br>47.78<br>38.5<br>27<br>28.11 | GAP/CA3 0,9:1<br>GAP/CA3 1:1<br>GAP/CA3 1,1:1<br>GAP/CA3 1,2:1<br>GAP/CA3 1,3:1<br>GAP/CA3 1,4:1<br>GAP/CA3 2,5:1 | Universal testing machine (UTM) model: Hounsfield, H25KS, UK [dumbbell shaped test specimens, at ambient temperature (27 8C) and rate of testing 50 mm/min                                                                                                                                                                                   | 19   |
| GAP                         | CI2<br>CA3<br>2-nitroderivative of CA3 | 0.21<br>8.22<br>5.72                              | 0.25<br>3.58<br>1.83                                 | 148.47<br>47.78<br>35.84                            | not given<br>not given<br>not given                                                                               | Universal Testing Machine((Hounsfield, H25KS)                                                                                                                                                                                                                                                                                                | 20   |
| GAP                         | CA4                                    | 1.52<br>3.60                                      | 0.21<br>0.41                                         | 47.6<br>25.4                                        | alkyne / azide 1,2:1<br>alkyne / azide 2:1                                                                        | INSTRON 6022 universal testing machine with a cross-head speed of 20 mm/min and a mean value of four replicates was taken                                                                                                                                                                                                                    | 22   |
| pAMMO                       |                                        | 0.89<br>2.56                                      | 0.41<br>0.67                                         | 66.4<br>37                                          | alkyne / azide 1,2:1<br>alkyne / azide 2:1                                                                        |                                                                                                                                                                                                                                                                                                                                              |      |
| Acyl-GAP                    |                                        | -                                                 | -                                                    | -                                                   | -                                                                                                                 |                                                                                                                                                                                                                                                                                                                                              |      |
| Acyl-GAP                    | CA2                                    | -                                                 | 2.69                                                 | 86                                                  | 10% CA2                                                                                                           | Dumbbell shape samples, universal testing machine Instron-6022, Shimadzu Co., Ltd., constant rate of 100 mm/min and mean values of five samples were taken                                                                                                                                                                                   | 125  |
|                             |                                        | -                                                 | 1.28                                                 | 464                                                 | Acyl-GAP+CA2/HTPB+CI1 0:1                                                                                         |                                                                                                                                                                                                                                                                                                                                              |      |
|                             |                                        | -                                                 | 2.69                                                 | 86                                                  | Acyl-GAP+CA2/HTPB+CI1 1:0                                                                                         |                                                                                                                                                                                                                                                                                                                                              |      |
|                             |                                        | -                                                 | 5.26                                                 | 318                                                 | Acyl-GAP+CA2/HTPB+CI1 1:1                                                                                         |                                                                                                                                                                                                                                                                                                                                              |      |
| MWCNT-HTPB + MWCNT-Acyl-GAP | CI1, CI2                               | -                                                 | 8.17                                                 | 312                                                 | NCO/OH=0,8; 50% Acyl-GAP                                                                                          | Instron-6022, Shimadzu Co., Ltd, dumbbell-shape specimens, constant rate of 100 mm/min, based on ASTM D638                                                                                                                                                                                                                                   | 24   |
| HTPB+GAP                    |                                        | -                                                 | 5.89                                                 | 359                                                 | NCO/OH=1; 50% GAP                                                                                                 |                                                                                                                                                                                                                                                                                                                                              | 25   |
| GAP                         | CA9                                    | 3.23                                              | 0.80                                                 | 28.3                                                | Azide / alkyne 1:2,5                                                                                              | CMT6503 universal testing machine (SANS, Shenzhen, China) at a speed of 50 mm/min. Five samples were tested for each composite and the average value was presented graphically                                                                                                                                                               | 26   |
|                             | CA10                                   | 7.44                                              | 1.77                                                 | 36.3                                                | Azide / alkyne 1:2,5 + 1% MWCNT                                                                                   |                                                                                                                                                                                                                                                                                                                                              |      |
|                             | CA11                                   | 6.33                                              | 1.41                                                 | 19.7                                                | Azide / alkyne 1:2,5 + 1% MWCNT-COOH                                                                              |                                                                                                                                                                                                                                                                                                                                              |      |
| GAP                         | dual isocyanate/CA6                    | 1.68                                              | -                                                    | -                                                   | NCO/OH 1,1:1; GAP / dipolarophile 100:1 (w/w)                                                                     | Dumbbell-shaped specimens (measuring 68.58x8.7x12.6 for the composite propellants) were determined using a universal testing machine (Model 5567, 1597 * 909 * 700 mm, Instron) at a crosshead rate of 50 mm/min at room temperature                                                                                                         | 27   |
|                             |                                        | 3.29                                              | -                                                    | -                                                   | NCO/OH 1,1:1; GAP / dipolarophile 100:1.5 (w/w)                                                                   |                                                                                                                                                                                                                                                                                                                                              |      |
|                             |                                        | 4.69                                              | -                                                    | -                                                   | NCO/OH 1,1:1; GAP / dipolarophile 100:2 (w/w)                                                                     |                                                                                                                                                                                                                                                                                                                                              |      |
|                             |                                        | 7.64                                              | -                                                    | -                                                   | NCO/OH 1,1:1; GAP / dipolarophile 100:5 (w/w)                                                                     |                                                                                                                                                                                                                                                                                                                                              |      |
|                             | dual isocyanate/CA5                    | 3.07                                              | -                                                    | -                                                   | NCO/OH 1,1:1; GAP / dipolarophile 100:1.5 (w/w)                                                                   |                                                                                                                                                                                                                                                                                                                                              |      |
|                             |                                        | 5.42                                              | -                                                    | -                                                   | NCO/OH 1,1:1; GAP / dipolarophile 100:2 (w/w)                                                                     |                                                                                                                                                                                                                                                                                                                                              |      |
|                             |                                        | 7.6                                               | -                                                    | -                                                   | NCO/OH 1,1:1; GAP / dipolarophile 100:5 (w/w)                                                                     |                                                                                                                                                                                                                                                                                                                                              |      |
| GAP                         | CI2                                    | 0.18<br>0.47<br>1.09                              | 0.26<br>0.5<br>0.7                                   | 161<br>122<br>69                                    | NCO/OH 1:0,8<br>NCO/OH 1:1<br>NCO/OH 1:1,2                                                                        | 810 MTS (Material Testing System), using microtensile specimens prepared according to ASTM D1708. All tensile testing was conducted at room temperature, using a crosshead speed of 50 mm/min                                                                                                                                                | 28   |
|                             |                                        | 0.082                                             | 0.23                                                 | 285                                                 | NCO/OH 1:1                                                                                                        |                                                                                                                                                                                                                                                                                                                                              |      |
|                             |                                        | 0.315                                             | 0.52                                                 | 192                                                 | NCO/OH 1:1,2                                                                                                      |                                                                                                                                                                                                                                                                                                                                              |      |
|                             | CI1, CI2 (1:1)                         | 0.6                                               | 0.76                                                 | 147                                                 | NCO/OH 1:1,4                                                                                                      |                                                                                                                                                                                                                                                                                                                                              |      |
|                             |                                        | 0.55                                              | 0.34                                                 | 68                                                  | CA3/GAP: 1:1                                                                                                      |                                                                                                                                                                                                                                                                                                                                              |      |
|                             | CA3                                    | 1.24                                              | 0.57                                                 | 48                                                  | CA3/GAP: 1,3:1                                                                                                    |                                                                                                                                                                                                                                                                                                                                              |      |
|                             |                                        | 0.71                                              | 0.6                                                  | 95                                                  | CA3/GAP: 0,5:1; NCO/OH 1:1                                                                                        |                                                                                                                                                                                                                                                                                                                                              |      |
|                             | CA3, CI1                               | 1.28                                              | 0.85                                                 | 72                                                  | CA3/GAP: 0,7:1; NCO/OH 1:1                                                                                        |                                                                                                                                                                                                                                                                                                                                              |      |
|                             |                                        | 0.57                                              | 0.79                                                 | 157                                                 | CA7/GAP: 0,5:1; NCO/OH 1:1                                                                                        |                                                                                                                                                                                                                                                                                                                                              |      |
|                             | CA7, CI1                               | 1.11                                              | 1.2                                                  | 117                                                 | CA7/GAP: 0,7:1; NCO/OH 1:1                                                                                        |                                                                                                                                                                                                                                                                                                                                              |      |
|                             |                                        | 1.48                                              | 0.26                                                 | 45.6                                                | Blank sample                                                                                                      |                                                                                                                                                                                                                                                                                                                                              |      |
|                             |                                        | 1.86                                              | 0.29                                                 | 37.9                                                | BA1 0,1%                                                                                                          |                                                                                                                                                                                                                                                                                                                                              |      |
| GAP/AI/NH4CIO4/HMX/BuNENA   | -                                      | 2.17                                              | 0.35                                                 | 36.7                                                | BA1 0,2%                                                                                                          | Dumbbell specimens, Instron-6022, Shimadzu Co., Ltd.), crosshead speed of 100 mm/min, room temperature. Five specimens were tested for each sample                                                                                                                                                                                           | 36   |
|                             |                                        | 2.26                                              | 0.36                                                 | 33.1                                                | BA1 0,3%                                                                                                          |                                                                                                                                                                                                                                                                                                                                              |      |
|                             |                                        | 1.57                                              | 0.3                                                  | 35.2                                                | BA2 0,1%                                                                                                          |                                                                                                                                                                                                                                                                                                                                              |      |
|                             |                                        | 1.59                                              | 0.36                                                 | 33.8                                                | BA2 0,2%                                                                                                          |                                                                                                                                                                                                                                                                                                                                              |      |
|                             |                                        | 1.8                                               | 0.41                                                 | 32.7                                                | BA2 0,3%                                                                                                          |                                                                                                                                                                                                                                                                                                                                              |      |
|                             |                                        | 1.85                                              | 0.32                                                 | 45.2                                                | BA3 0,1%                                                                                                          |                                                                                                                                                                                                                                                                                                                                              |      |
|                             |                                        | 2.07                                              | 0.39                                                 | 44.2                                                | BA3 0,2%                                                                                                          |                                                                                                                                                                                                                                                                                                                                              |      |
|                             |                                        | 2.1                                               | 0.39                                                 | 43.1                                                | BA3 0,3%                                                                                                          |                                                                                                                                                                                                                                                                                                                                              |      |
|                             |                                        | -                                                 | -                                                    | -                                                   | -                                                                                                                 |                                                                                                                                                                                                                                                                                                                                              |      |
|                             |                                        | -                                                 | -                                                    | -                                                   | -                                                                                                                 |                                                                                                                                                                                                                                                                                                                                              |      |
| GAP                         | toluene diisocyanate                   | -                                                 | 1.6                                                  | 1041                                                | R = NCO/OH, R=1,6                                                                                                 | Instron 26022 Universal testing machine in accordance with GB/T528-1998                                                                                                                                                                                                                                                                      | 37   |
| FGAP                        | CI2                                    | -                                                 | 1.5                                                  | 81.6                                                | NCO/OH = 1                                                                                                        | AG-X Plus testing machine (Shimadzu, Japan), with a tensile rate of 50 mm/min. The test films were cut into dumbbell-shaped samples with a width of 20mm and the distance between testing marks was 30 mm. The test strips were kept at 0% humidity for 7 days before measurement. A mean value of five replicates from each film was taken. | 47   |
| GAP                         |                                        | -                                                 | 0.66                                                 | 51.1                                                |                                                                                                                   |                                                                                                                                                                                                                                                                                                                                              |      |
| GAP                         | CI1                                    | -                                                 | 2.4                                                  | 101                                                 | NCO/OH = 1                                                                                                        | Shimadzu AG-X Plus universal testing machine (Shimadzu, Japan) with a tensile rate of 50 mm/min. The copolyurethane networks were cut into dumbbell-shaped specimens (dimensions: 35 mm x 6 mm x 2 mm) and kept at 0% humidity for 7 days before measurement. A mean value of five replicates from each film was taken                       | 50   |
| FGAP                        |                                        | -                                                 | 5.52                                                 | 162.8                                               |                                                                                                                   |                                                                                                                                                                                                                                                                                                                                              |      |
| ETPE+NC                     | -                                      | -                                                 | 7.5                                                  | 490                                                 | NC 0%                                                                                                             | Instron 6022 (Shimadzu Co. Ltd, Japan), constant strain rate of 100mm/min, room temperature. The dimensions of the dumb-bell samples were 20mm (neck area length) × 4mm (width) × 2mm (thickness). The reported values were calculated as average values from five specimens of each sample                                                  | 52   |
|                             |                                        | -                                                 | 8.9                                                  | 485.6                                               | NC 10%                                                                                                            |                                                                                                                                                                                                                                                                                                                                              |      |
|                             |                                        | -                                                 | 7.8                                                  | 110.5                                               | NC 20%                                                                                                            |                                                                                                                                                                                                                                                                                                                                              |      |
|                             |                                        | -                                                 | 8.7                                                  | 96.8                                                | NC 30%                                                                                                            |                                                                                                                                                                                                                                                                                                                                              |      |
|                             |                                        | -                                                 | 13.3                                                 | 45.1                                                | NC 40%                                                                                                            |                                                                                                                                                                                                                                                                                                                                              |      |
| PBAMO/GAP                   | toluene diisocyanate + 1,4-butanediol  | -                                                 | 2.55                                                 | 217                                                 | TDI+BDO = 30%                                                                                                     | Instron-6022 (Shimadzu Co., Ltd.), strain rate of 100 mm/min, 25 °C.The dimensions of the samples were 20 mm (neck area length) 9 4 mm (width) 9 2 mm (thickness). We usually take 5 samples and use the method of averaging the results                                                                                                     | 53   |
|                             |                                        | -                                                 | -                                                    | -                                                   | -                                                                                                                 |                                                                                                                                                                                                                                                                                                                                              |      |
|                             |                                        | -                                                 | -                                                    | -                                                   | -                                                                                                                 |                                                                                                                                                                                                                                                                                                                                              |      |
|                             |                                        | -                                                 | -                                                    | -                                                   | -                                                                                                                 |                                                                                                                                                                                                                                                                                                                                              |      |
|                             |                                        | -                                                 | -                                                    | -                                                   | -                                                                                                                 |                                                                                                                                                                                                                                                                                                                                              |      |
| GAP/P(EO-co-THF)            | CI1, CI2 NCO/OH = 1,2:1                | -                                                 | 0.662                                                | 212.4                                               | Flexible polyether: 0 %(w/w)                                                                                      | Dumbbell specimens, tensile testing machine [AGS-X, Shimadzu Co., Ltd. (Kyoto, Japan)], crosshead speed of 100mm/min, at 25 and -40°C. Five specimens were tested for each sample to obtain average values. Samples were measured after conditioning the specimen at a given temperature for a minimum duration of 4h                        | 54   |
|                             |                                        | -                                                 | 0.694                                                | 237.4                                               | Flexible polyether: 5 %(w/w)                                                                                      |                                                                                                                                                                                                                                                                                                                                              |      |
|                             |                                        | -                                                 | 0.824                                                | 279.6                                               | Flexible polyether: 10 %(w/w)                                                                                     |                                                                                                                                                                                                                                                                                                                                              |      |
|                             |                                        | -                                                 | 0.857                                                | 280.7                                               | Flexible polyether: 15 %(w/w)                                                                                     |                                                                                                                                                                                                                                                                                                                                              |      |
|                             |                                        | -                                                 | 0.933                                                | 284.1                                               | Flexible polyether: 20 %(w/w)                                                                                     |                                                                                                                                                                                                                                                                                                                                              |      |
|                             |                                        | -                                                 | 0.953                                                | 289.9                                               | Flexible polyether: 25 %(w/w)                                                                                     |                                                                                                                                                                                                                                                                                                                                              |      |
|                             |                                        | -                                                 | 0.986                                                | 296.1                                               | Flexible polyether: 30 %(w/w)                                                                                     |                                                                                                                                                                                                                                                                                                                                              |      |
| GAP/PAO                     | CI1, CI2 NCO/OH = 1,2:1                | -                                                 | 0.662                                                | 212.4                                               | Flexible polyether: 0 %(w/w)                                                                                      |                                                                                                                                                                                                                                                                                                                                              |      |
|                             |                                        | -                                                 | 0.753                                                | 256.7                                               | Flexible polyether: 5 %(w/w)                                                                                      |                                                                                                                                                                                                                                                                                                                                              |      |
|                             |                                        | -                                                 | 0.885                                                | 260.4                                               | Flexible polyether: 10 %(w/w)                                                                                     |                                                                                                                                                                                                                                                                                                                                              |      |
|                             |                                        | -                                                 | 1.633                                                | 271.4                                               | Flexible polyether: 15 %(w/w)                                                                                     |                                                                                                                                                                                                                                                                                                                                              |      |
|                             |                                        | -                                                 | 1.917                                                | 276.1                                               | Flexible polyether: 20 %(w/w)                                                                                     |                                                                                                                                                                                                                                                                                                                                              |      |
|                             |                                        | -                                                 | 2.528                                                | 330.1                                               | Flexible polyether: 25 %(w/w)                                                                                     |                                                                                                                                                                                                                                                                                                                                              |      |
|                             |                                        | -                                                 | 3.512                                                | 435.4                                               | Flexible polyether: 30 %(w/w)                                                                                     |                                                                                                                                                                                                                                                                                                                                              |      |
| GAP-based PU                | CI1                                    | 0.12                                              | 0.21                                                 | 286                                                 | Alkyne/azide = 0/1; 2,27mmol CI1 for 1,62 mmol GAP                                                                | texture analyzer (TA-HD+1500, Stable Micro Systems Ltd.)                                                                                                                                                                                                                                                                                     |      |
| DNPMP (n=1)/GAP-based PU    |                                        | 0.13<br>0.06                                      | 0.27<br>0.43                                         | 293<br>505                                          | Alkyne/azide = 0.1/1<br>Alkyne/azide = 0.3/1                                                                      |                                                                                                                                                                                                                                                                                                                                              |      |

|                                 |                             |      |       |       |                      |                                                                                                                                                                                                                                                                                                                                                                              |    |
|---------------------------------|-----------------------------|------|-------|-------|----------------------|------------------------------------------------------------------------------------------------------------------------------------------------------------------------------------------------------------------------------------------------------------------------------------------------------------------------------------------------------------------------------|----|
|                                 |                             | 1.05 | 1.71  | 390   | Alkyne/azide = 0.5/1 | with a 50 kgf load cell, TA-51 needle jig, and software (Texture Expert, Stable Micro Systems Ltd.). The probe moving velocity was 0.8 mms $\phi$ 1 . The tensile test samples were cut from the cast film with the specification (DIN-53504, type (S2)). All tensile strengths, ultimate elongations and initial moduli reported were the averages of three measured values | 70 |
| DNPMB (n=2)/GAP-based PU        | CI1                         | 0.09 | 0.3   | 402   | Alkyne/azide = 0.1/1 |                                                                                                                                                                                                                                                                                                                                                                              |    |
|                                 |                             | 0.08 | 0.41  | 539   | Alkyne/azide = 0.3/1 |                                                                                                                                                                                                                                                                                                                                                                              |    |
|                                 |                             | 0.34 | 1.21  | 461   | Alkyne/azide = 0.5/1 |                                                                                                                                                                                                                                                                                                                                                                              |    |
| PDNP (n=1)/GAP-based PU         |                             | 0.1  | 0.32  | 425   | Alkyne/azide = 0.1/1 |                                                                                                                                                                                                                                                                                                                                                                              |    |
|                                 |                             | 0.15 | 0.55  | 638   | Alkyne/azide = 0.3/1 |                                                                                                                                                                                                                                                                                                                                                                              |    |
|                                 |                             | 6.06 | 2.9   | 687   | Alkyne/azide = 0.5/1 |                                                                                                                                                                                                                                                                                                                                                                              |    |
| BDNP (n=2)/GAP-based PU         |                             | 0.09 | 0.28  | 421   | Alkyne/azide = 0.1/1 |                                                                                                                                                                                                                                                                                                                                                                              |    |
|                                 |                             | 0.11 | 0.57  | 574   | Alkyne/azide = 0.3/1 |                                                                                                                                                                                                                                                                                                                                                                              |    |
|                                 |                             | 3.2  | 1.67  | 684   | Alkyne/azide = 0.5/1 |                                                                                                                                                                                                                                                                                                                                                                              |    |
|                                 |                             |      |       |       |                      |                                                                                                                                                                                                                                                                                                                                                                              |    |
| GAP doped NC and NG propellants | -                           | -    | 44.97 | 7.314 | 30% GAP / NC         | Instron-6022, Shimadzu Co., Ltd., China, constant rate of 100 mm/min, at room temperature                                                                                                                                                                                                                                                                                    | 84 |
|                                 |                             | -    | 44.93 | 7.311 | 30% GAP / NC         |                                                                                                                                                                                                                                                                                                                                                                              |    |
|                                 |                             | -    | 44.82 | 7.727 | 30% GAP / NC         |                                                                                                                                                                                                                                                                                                                                                                              |    |
|                                 |                             | -    | 37.71 | 37.4  | 40% GAP / NC         |                                                                                                                                                                                                                                                                                                                                                                              |    |
|                                 |                             | -    | 37.37 | 36.94 | 40% GAP / NC         |                                                                                                                                                                                                                                                                                                                                                                              |    |
|                                 |                             | -    | 38.42 | 36.57 | 40% GAP / NC         |                                                                                                                                                                                                                                                                                                                                                                              |    |
|                                 |                             | -    | 29.92 | 75.78 | 50% GAP / NC         |                                                                                                                                                                                                                                                                                                                                                                              |    |
|                                 |                             | -    | 30.16 | 74.37 | 50% GAP / NC         |                                                                                                                                                                                                                                                                                                                                                                              |    |
|                                 |                             | -    | 29.45 | 74.9  | 50% GAP / NC         |                                                                                                                                                                                                                                                                                                                                                                              |    |
|                                 |                             | -    | 31.38 | 35.11 | 40% GAP / NG         |                                                                                                                                                                                                                                                                                                                                                                              |    |
|                                 |                             | -    | 31.05 | 35.17 | 40% GAP / NG         |                                                                                                                                                                                                                                                                                                                                                                              |    |
|                                 |                             | -    | 31.61 | 35.29 | 40% GAP / NG         |                                                                                                                                                                                                                                                                                                                                                                              |    |
| GAP doped propellants           | CI2                         | 5.26 | 0.72  | 26.3  | 0% GAP / -40°C       | Instron 4505 tensile tester. Cured propellants were cut into slices, from which JANNAF dog bones were stamped. The tests were carried out at temperatures of -40, 20 and 50 degrees Celsius with 100 mm/min cross-head speed                                                                                                                                                 | 85 |
|                                 | CI3                         | 7.18 | 1.18  | 30.2  | 10% GAP / -40°C      |                                                                                                                                                                                                                                                                                                                                                                              |    |
|                                 | CI4                         | 7.17 | 1.16  | 29.8  | 20% GAP / -40°C      |                                                                                                                                                                                                                                                                                                                                                                              |    |
|                                 | CI5                         | 3.02 | 0.41  | 34.9  | 0% GAP / +20°C       |                                                                                                                                                                                                                                                                                                                                                                              |    |
|                                 | CI6                         | 3.81 | 0.54  | 52.5  | 10% GAP / +20°C      |                                                                                                                                                                                                                                                                                                                                                                              |    |
|                                 | CI7                         | 3.71 | 0.55  | 52.1  | 20% GAP / +20°C      |                                                                                                                                                                                                                                                                                                                                                                              |    |
|                                 | CI8                         | 2.14 | 0.4   | 39.5  | 0% GAP / +50°C       |                                                                                                                                                                                                                                                                                                                                                                              |    |
|                                 | CI9                         | 2.23 | 0.5   | 52.4  | 10% GAP / +50°C      |                                                                                                                                                                                                                                                                                                                                                                              |    |
|                                 | CI10                        | 2.2  | 0.45  | 52.6  | 20% GAP / +50°C      |                                                                                                                                                                                                                                                                                                                                                                              |    |
|                                 | GAP (21%) doped propellants | CI2  | 4.71  | 0.29  | 18.9                 |                                                                                                                                                                                                                                                                                                                                                                              |    |
| 4.53                            |                             |      | 0.26  | 14.7  | Propellant 2         |                                                                                                                                                                                                                                                                                                                                                                              |    |
| 2.25                            |                             |      | 0.22  | 24.4  | Propellant 3         |                                                                                                                                                                                                                                                                                                                                                                              |    |
